# Supplementary material for: Simultaneous measurement of blood pressure and RBC aggregation by monitoring on–off blood flows supplied from a disposable air-compressed pump
Source: Royal Society of Chemistry journal article supplement (doi:10.1039/c9an00025a), 2019-01-01
Supplement: c9an00025a1.pdf [file c9an00025a1.pdf]

## SUPPLEMENTARY MATERIAL

Simultaneous measurement of blood pressure and RBC aggregation by monitoring on-off blood flows supplied from a disposable air-compressed pump

Yang Jun Kang

Department of Mechanical Engineering, Chosun University, Gwangju, Republic of Korea

\*Address: 309 Pilmun-daero, Dong-gu, Gwangju, Republic of Korea. Fax: +82-62-230-7055,

Electronic mail: [yjkang2011@chosun.ac.kr](mailto:yjkang2011@chosun.ac.kr)

## S1. Quantification of pressure index at constant flow-rate of 2 mL/h controlled with syringe pump

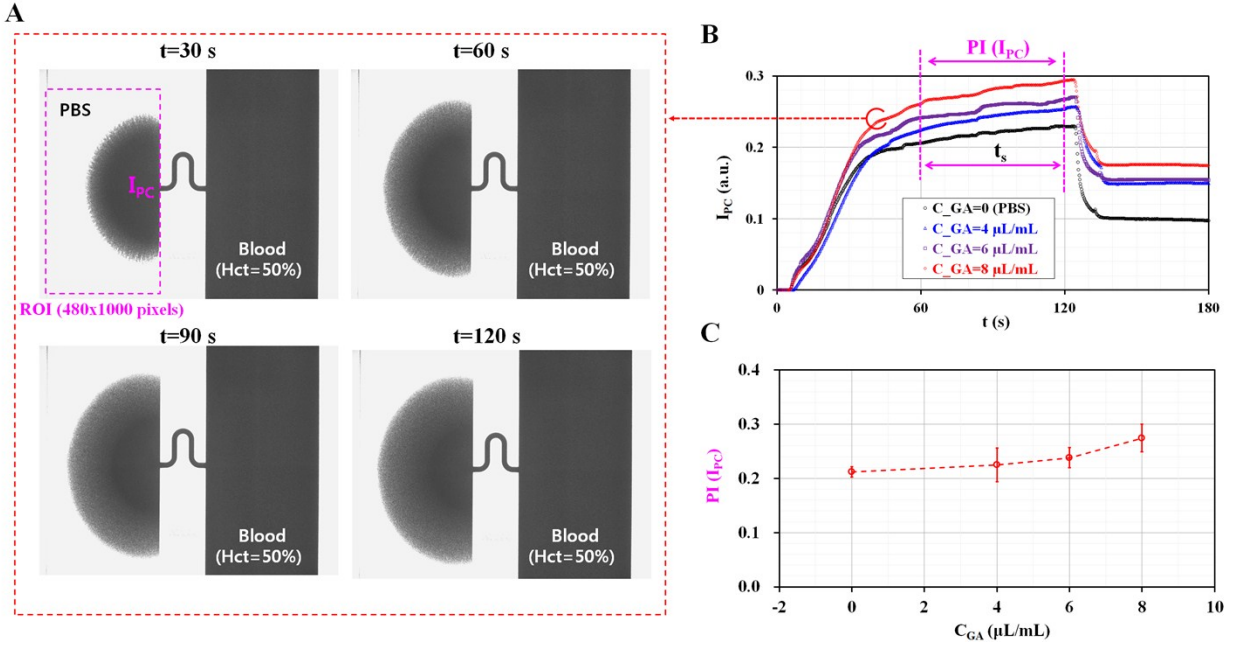

**Fig. S1** Variations of pressure index (PI) for hardened blood composed of RBCs fixed with various concentrations of GA solution ( $C_{GA}=0, 4, 6,$  and  $8 \mu\text{L/mL}$ ) at a constant flow-rate of  $2 \text{ mL/h}$  with a syringe pump. The hardened blood ( $\text{Hct}=50\%$ ) was prepared by adding hardened RBCs into PBS solution. **(A)** Microscopic images captured by high-speed camera with an elapse of time ( $t$ ) ( $t=30, 60, 90,$  and  $120 \text{ s}$ ). Here, normal RBCs were fixed with  $C_{GA}=8 \mu\text{L/mL}$ . **(B)** Temporal variations of  $I_{PC}$  with respect to  $C_{GA}$ .  $PI (I_{PC})$  was calculated by averaging temporal variations of  $I_{PC}$  from  $t=60 \text{ s}$  to  $t=120 \text{ s}$  (i.e.,  $t_s=60 \text{ s}$ ). **(C)** Variation of  $PI (I_{PC})$  with respect to  $C_{GA}$ .
